# Supplementary material
Source: publisher site journal article supplement (https://www.dovepress.com/article/362257)
Supplement: Supplementary file 1 [file get_supplementary_file.php]

| **Correlations** | | | | |
| --- | --- | --- | --- | --- |
|  | | **MPV at admission** | **NTproBNP at admission** | **NTproBNP at discharge** |
| **MPV at admission** | Pearson Correlation | 1 | .144 | .249** |
| Sig. (2-tailed) |  | .102 | .004 |
| N | 130 | 130 | 130 |
| **NTproBNP at admission** | Pearson Correlation | .144 | 1 | .687** |
| Sig. (2-tailed) | .102 |  | .000 |
| N | 130 | 130 | 130 |
| **NTproBNP at discharge** | Pearson Correlation | .249** | .687** | 1 |
| Sig. (2-tailed) | .004 | .000 |  |
| N | 130 | 130 | 130 |
| **. Correlation is significant at the 0.01 level (2-tailed). | | | | |
